# Supplementary material for: Nel positively regulates the genesis of retinal ganglion cells by promoting their differentiation and survival during development
Source: PubMed Central journal article supplement — Mol Biol Cell. 2014 Jan 15;25(2):234–44. doi: 10.1091/mbc.E13-08-0453 (PMC3890344; doi:10.1091/mbc.e13-08-0453), 2014-01-15
Supplement: supp_E13-08-0453v1_CombinedSupMats.pdf [file supp_E13-08-0453v1_CombinedSupMats.pdf]

# Supplemental Materials

*Molecular Biology of the Cell*

Nakamoto et al.

**Supplemental Figure. Introduction of control vectors does not affect survival of retinal cells.**

(A-D) Control vectors for Nel overexpression (RCAS-IRES-EGFP) (A, C) or RNAi knockdown (pT2K-CAGGS-Control miRNA-EmGFP with pCAGGS-T2TP) (B, D) were introduced into one half (left side) of the developing retina by *in ovo* electroporation at HH9-11 (E1.5). Retinal sections were prepared at E6, and apoptotic cells were detected by TUNEL assay (red). The areas of transgene expression are marked by expression of a GFP reporter (Transfection side, green). A subset of TUNEL-positive cells is indicated by arrows. Neither ectopic expression of EGFP alone nor introduction of control miRNA has not significantly affected programmed cell death in the developing retina. Scale bars, 50  $\mu$ m.

(E) Quantification of apoptotic cells. The numbers of TUNEL-positive cells on the transfected side were compared with those on the control side and plotted as mean  $\pm$  s.e.m. ANOVA test.

RCAS-EGFP

Control miRNA

TUNEL

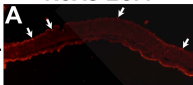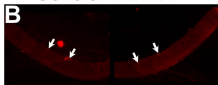

GFP

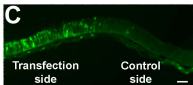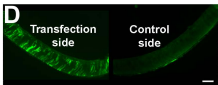

E

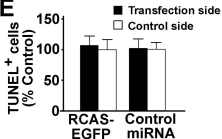

Supplemental Figure (Nakamoto et al.)
